# Supplementary material
Source: Royal Society of Chemistry journal article supplement (doi:10.1039/d6em00197a)
Supplement: d6em00197a1.pdf [file d6em00197a1.pdf]

1

2

3

## Supplemental Information for

4

# 5 Surface-Sensitive Spectrometry: New Insights into 6 Radical Reactions at Interfaces

7 Zachary R. Schiffman<sup>1</sup>, Yuekun Yang<sup>1</sup>, Barbara J. Finlayson-Pitts<sup>1</sup> and Lisa M. Wingen<sup>1\*</sup>

8 <sup>1</sup>*Department of Chemistry, University of California, Irvine, Irvine, California 92697, USA*

9 \*Email: [wingenit@uci.edu](mailto:wingenit@uci.edu)

10

11

12

13

14

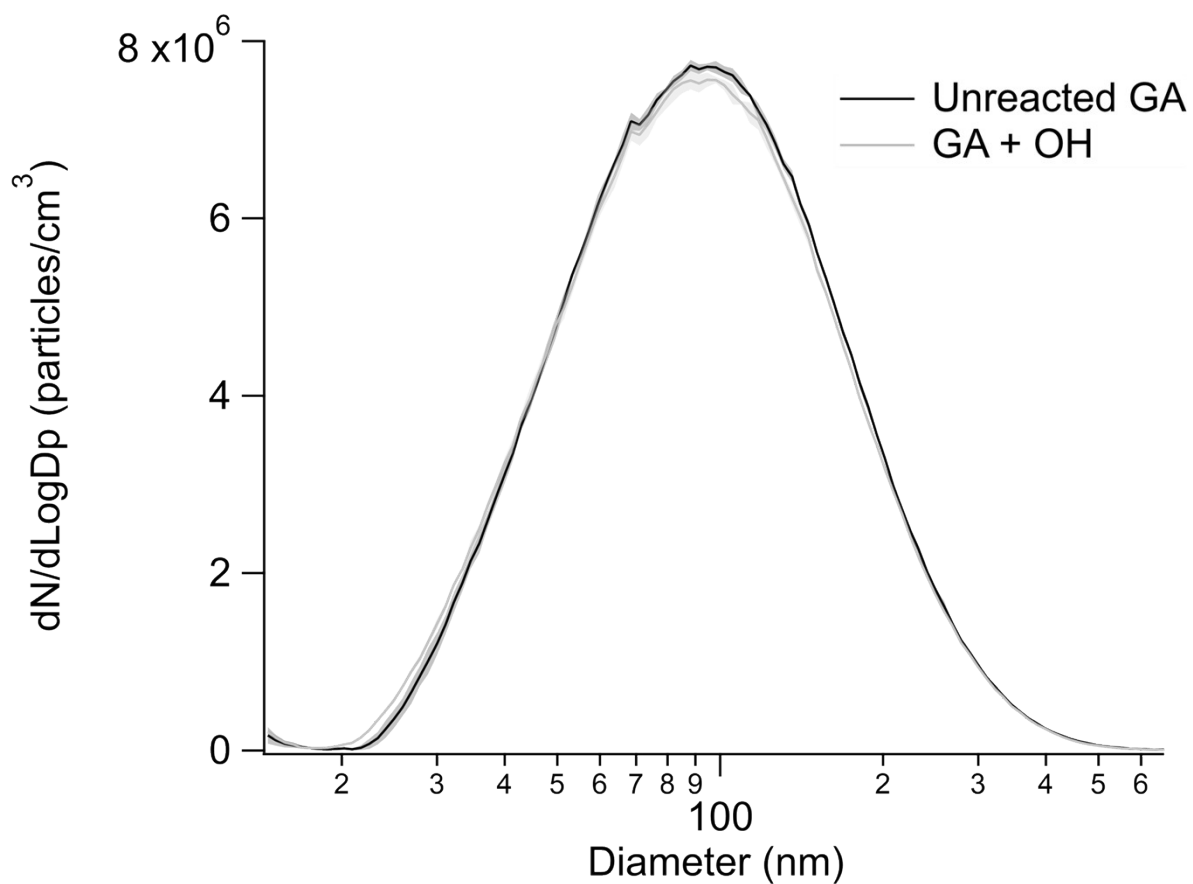

15

16 **Figure S1.** Typical size distributions of atomized and dried GA particles before (black) and after  
17 (gray) reaction with OH radicals (0.9 ppm TME and 7.5 ppm ozone) as measured with a scanning  
18 mobility particle sizer (SMPS). The GA concentration in the atomizer was 20 mM. Each  
19 distribution is an average of five scans  $\pm$  one standard deviation.

20

21

22

23

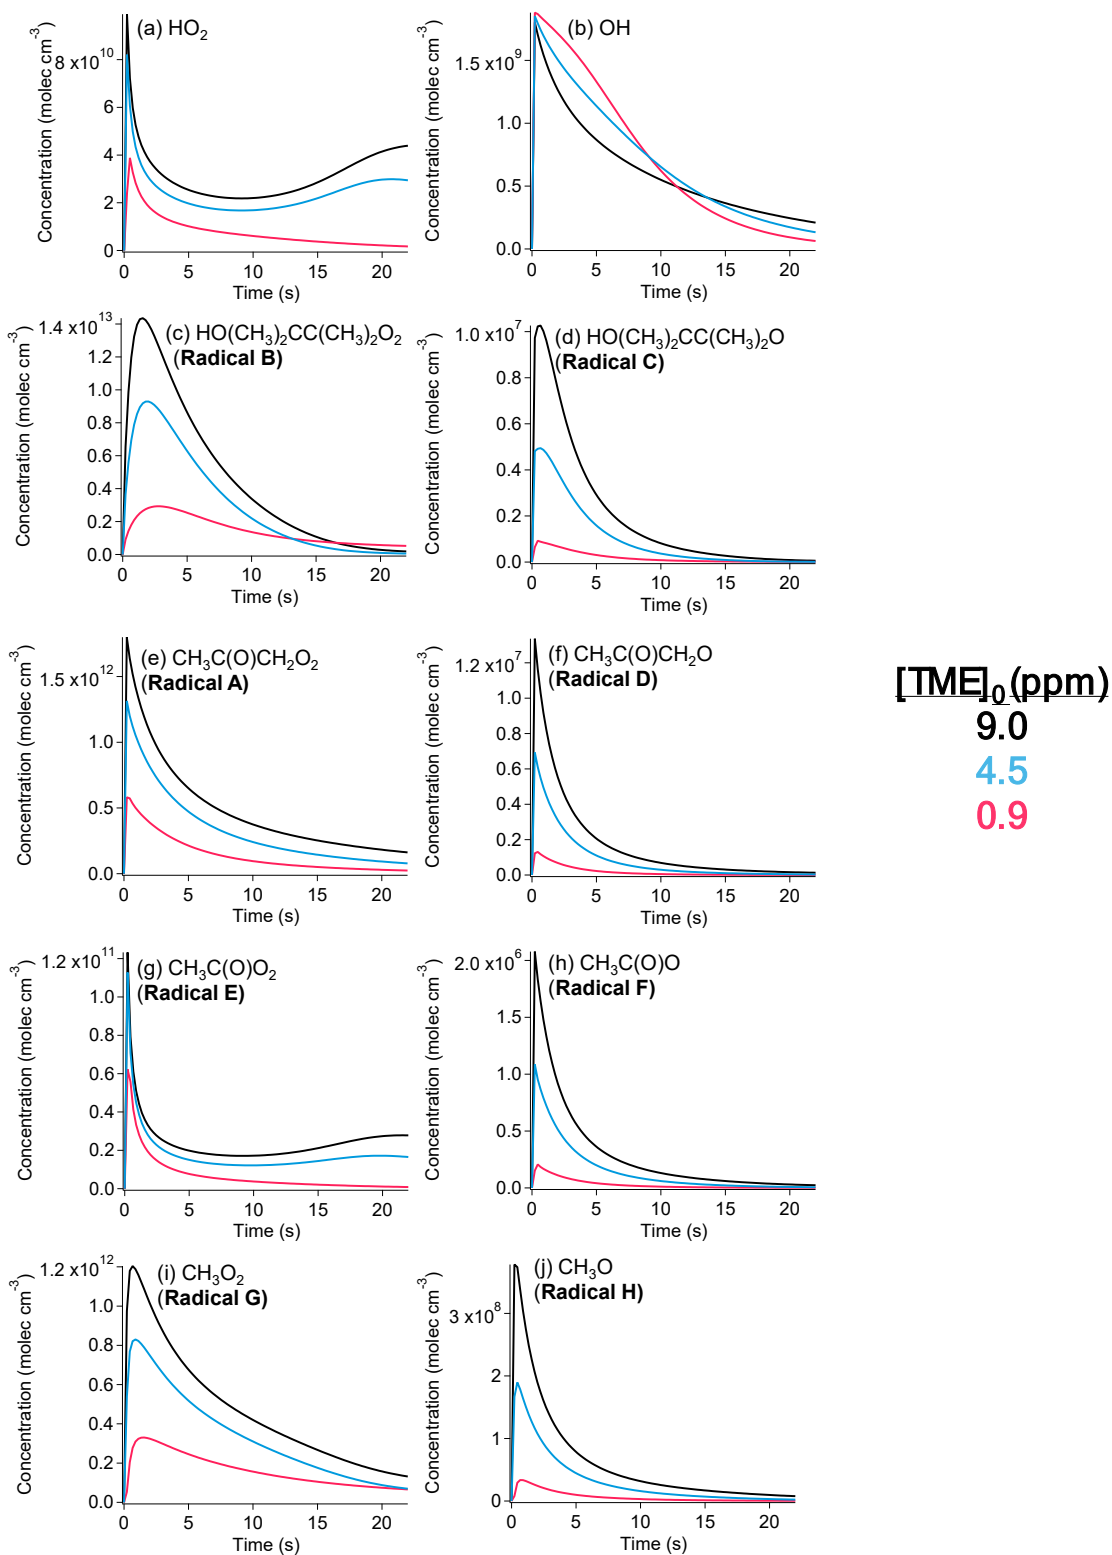

24

25 **Figure S2.** Examples of output from the KinSim model of gas-phase radicals for initial  
 26 conditions of 7.5 ppm O<sub>3</sub> and variable [TME]<sub>0</sub> in air. (a) HO<sub>2</sub>; (b) OH; (c) Radical B = hydroxy-

27 TME-peroxy =  $\text{HO}(\text{CH}_3)_2\text{CC}(\text{CH}_3)_2\text{O}_2$ ; (d) Radical C = hydroxy-TME-alkoxy =  
28  $\text{HO}(\text{CH}_3)_2\text{CC}(\text{CH}_3)_2\text{O}$ ; (e) Radical A = acetyl peroxy =  $\text{CH}_3\text{C}(\text{O})\text{CH}_2\text{O}_2$ ; (f) Radical D =  
29 acetyl alkoxy =  $\text{CH}_3\text{C}(\text{O})\text{CH}_2\text{O}$ ; (g) Radical E = acetyl peroxy =  $\text{CH}_3\text{C}(\text{O})\text{O}_2$ ; (h) Radical F =  
30 acetyl alkoxy =  $\text{CH}_3\text{C}(\text{O})\text{O}$ ; (i) Radical G = methyl peroxy =  $\text{CH}_3\text{O}_2$ ; (j) Radical H = methyl alkoxy  
31 =  $\text{CH}_3\text{O}$ .

32 **Table S1.** The reactions used in the KinSim model including rate constants.

| Reactant 1                                         | (Reactant 2)                                                                       | Product 1                                          | (Product 2)                                                           | (Product 3)                    | k (cm <sup>3</sup> molec <sup>-1</sup> s <sup>-1</sup> ) <sup>a</sup> |
|----------------------------------------------------|------------------------------------------------------------------------------------|----------------------------------------------------|-----------------------------------------------------------------------|--------------------------------|-----------------------------------------------------------------------|
| Acetol                                             | OH                                                                                 | Methylglyoxal                                      | HO <sub>2</sub>                                                       |                                | 4.45E-12 <sup>b</sup>                                                 |
| Acetone                                            | OH                                                                                 | CH <sub>3</sub> C(O)CH <sub>2</sub> O <sub>2</sub> |                                                                       |                                | 1.75E-13 <sup>b</sup>                                                 |
| CH <sub>3</sub> C(O)CH <sub>2</sub> O              |                                                                                    | CH <sub>3</sub> C(O)O <sub>2</sub>                 | Formaldehyde                                                          |                                | 1.00E06 <sup>b</sup>                                                  |
| CH <sub>3</sub> C(O)CH <sub>2</sub> O <sub>2</sub> | CH <sub>3</sub> O <sub>2</sub>                                                     | CH <sub>3</sub> C(O)CH <sub>2</sub> O              | CH <sub>3</sub> O                                                     | O <sub>2</sub>                 | 1.10E-12 <sup>c</sup>                                                 |
| CH <sub>3</sub> C(O)CH <sub>2</sub> O <sub>2</sub> | CH <sub>3</sub> O <sub>2</sub>                                                     | MeOH                                               | Methylglyoxal                                                         | O <sub>2</sub>                 | 1.90E-12 <sup>c</sup>                                                 |
| CH <sub>3</sub> C(O)CH <sub>2</sub> O <sub>2</sub> | CH <sub>3</sub> O <sub>2</sub>                                                     | Formaldehyde                                       | Acetol                                                                | O <sub>2</sub>                 | 7.60E-13 <sup>c</sup>                                                 |
| CH <sub>3</sub> C(O)CH <sub>2</sub> O <sub>2</sub> | HO <sub>2</sub>                                                                    | CH <sub>3</sub> C(O)CH <sub>2</sub> O              | OH                                                                    |                                | 1.35E-12 <sup>b</sup>                                                 |
| CH <sub>3</sub> C(O)CH <sub>2</sub> O <sub>2</sub> | HO <sub>2</sub>                                                                    | CH <sub>3</sub> C(O)CH <sub>2</sub> OOH            |                                                                       |                                | 7.67E-12 <sup>b</sup>                                                 |
| CH <sub>3</sub> C(O)CH <sub>2</sub> O <sub>2</sub> | HO(CH <sub>3</sub> ) <sub>2</sub> CC(CH <sub>3</sub> ) <sub>2</sub> O <sub>2</sub> | CH <sub>3</sub> C(O)CH <sub>2</sub> O              | HO(CH <sub>3</sub> ) <sub>2</sub> CC(CH <sub>3</sub> ) <sub>2</sub> O |                                | 3.22E-14 <sup>bj</sup>                                                |
| CH <sub>3</sub> C(O)CH <sub>2</sub> O <sub>2</sub> | HO(CH <sub>3</sub> ) <sub>2</sub> CC(CH <sub>3</sub> ) <sub>2</sub> O <sub>2</sub> | Pinacol <sup>h</sup>                               | Methylglyoxal                                                         |                                | 1.38E-14 <sup>bj</sup>                                                |
| CH <sub>3</sub> C(O)CH <sub>2</sub> O <sub>2</sub> | CH <sub>3</sub> C(O)CH <sub>2</sub> O <sub>2</sub>                                 | CH <sub>3</sub> C(O)CH <sub>2</sub> O              | CH <sub>3</sub> C(O)CH <sub>2</sub> O                                 | O <sub>2</sub>                 | 1.58E-12 <sup>d</sup>                                                 |
| CH <sub>3</sub> C(O)CH <sub>2</sub> O <sub>2</sub> | CH <sub>3</sub> C(O)CH <sub>2</sub> O <sub>2</sub>                                 | Methylglyoxal                                      | Acetol                                                                |                                | 3.22E-12 <sup>d</sup>                                                 |
| CH <sub>3</sub> C(O)CH <sub>2</sub> OOH            | OH                                                                                 | CH <sub>3</sub> C(O)CH <sub>2</sub> O <sub>2</sub> |                                                                       |                                | 3.59E-12 <sup>b</sup>                                                 |
| Acetic acid                                        | OH                                                                                 | CH <sub>3</sub> O <sub>2</sub>                     |                                                                       |                                | 8.00E-13 <sup>b</sup>                                                 |
| CH <sub>3</sub> C(O)O                              | O <sub>2</sub>                                                                     | CO <sub>2</sub>                                    | CH <sub>3</sub> O <sub>2</sub>                                        |                                | 1.20E-12 <sup>b</sup>                                                 |
| CH <sub>3</sub> C(O)O <sub>2</sub>                 | CH <sub>3</sub> C(O)O <sub>2</sub>                                                 | CH <sub>3</sub> C(O)O                              | CH <sub>3</sub> COO                                                   | O <sub>2</sub>                 | 1.30E-11 <sup>e</sup>                                                 |
| CH <sub>3</sub> C(O)O <sub>2</sub>                 | CH <sub>3</sub> O <sub>2</sub>                                                     | CH <sub>3</sub> C(O)O                              | CH <sub>3</sub> O                                                     | O <sub>2</sub>                 | 1.30E-11 <sup>e</sup>                                                 |
| CH <sub>3</sub> C(O)O <sub>2</sub>                 | CH <sub>3</sub> O <sub>2</sub>                                                     | Acetic acid                                        | Formaldehyde                                                          | O <sub>2</sub>                 | 6.50E-12 <sup>e</sup>                                                 |
| CH <sub>3</sub> C(O)O <sub>2</sub>                 | CH <sub>3</sub> C(O)CH <sub>2</sub> O <sub>2</sub>                                 | CH <sub>3</sub> C(O)O                              | CH <sub>3</sub> C(O)CH <sub>2</sub> O                                 |                                | 2.50E-12 <sup>c</sup>                                                 |
| CH <sub>3</sub> C(O)O <sub>2</sub>                 | CH <sub>3</sub> C(O)CH <sub>2</sub> O <sub>2</sub>                                 | Acetic acid                                        | Methylglyoxal                                                         | O <sub>2</sub>                 | 2.50E-12 <sup>c</sup>                                                 |
| CH <sub>3</sub> C(O)O <sub>2</sub>                 | HO <sub>2</sub>                                                                    | Acetic acid                                        | O <sub>3</sub>                                                        |                                | 9.10E-12 <sup>b</sup>                                                 |
| CH <sub>3</sub> C(O)O <sub>2</sub>                 | HO <sub>2</sub>                                                                    | CH <sub>3</sub> C(O)OOH                            | O <sub>2</sub>                                                        |                                | 3.90E-12 <sup>b</sup>                                                 |
| CH <sub>3</sub> C(O)O <sub>2</sub>                 | HO(CH <sub>3</sub> ) <sub>2</sub> CC(CH <sub>3</sub> ) <sub>2</sub> O <sub>2</sub> | CH <sub>3</sub> C(O)O                              | HO(CH <sub>3</sub> ) <sub>2</sub> CC(CH <sub>3</sub> ) <sub>2</sub> O |                                | 1.10E-11 <sup>fj</sup>                                                |
| CH <sub>3</sub> C(O)OOH                            | OH                                                                                 | CH <sub>3</sub> C(O)O <sub>2</sub>                 |                                                                       |                                | 3.70E-12 <sup>b</sup>                                                 |
| CO                                                 | OH                                                                                 | HO <sub>2</sub>                                    |                                                                       |                                | 2.28E-13 <sup>b</sup>                                                 |
| Criegee                                            |                                                                                    | CH <sub>3</sub> C(O)CH <sub>2</sub> O <sub>2</sub> | OH                                                                    |                                | 1.00E06 <sup>b</sup>                                                  |
| Formaldehyde                                       | OH                                                                                 | HO <sub>2</sub>                                    | CO                                                                    |                                | 8.49E-12 <sup>b</sup>                                                 |
| H                                                  | HO <sub>2</sub>                                                                    | H <sub>2</sub>                                     | O <sub>2</sub>                                                        |                                | 5.60E-12 <sup>b</sup>                                                 |
| H                                                  | HO <sub>2</sub>                                                                    | OH                                                 | OH                                                                    |                                | 7.20E-11 <sup>b</sup>                                                 |
| H                                                  | HO <sub>2</sub>                                                                    | H <sub>2</sub> O                                   | O                                                                     |                                | 2.40E-12 <sup>b</sup>                                                 |
| H                                                  | O <sub>2</sub>                                                                     | HO <sub>2</sub>                                    |                                                                       |                                | 1.00E-12 <sup>b</sup>                                                 |
| HO <sub>2</sub>                                    | HO <sub>2</sub>                                                                    | H <sub>2</sub> O <sub>2</sub>                      | O <sub>2</sub>                                                        |                                | 1.60E-12 <sup>b</sup>                                                 |
| HO <sub>2</sub>                                    | O <sub>3</sub>                                                                     | OH                                                 | O <sub>2</sub>                                                        | O <sub>2</sub>                 | 2.00E-15 <sup>b</sup>                                                 |
| Methylglyoxal                                      | OH                                                                                 | H <sub>2</sub> O                                   | CH <sub>3</sub> C(O)O <sub>2</sub>                                    | CO                             | 7.85E-12 <sup>b</sup>                                                 |
| Methylglyoxal                                      | OH                                                                                 | CO                                                 | CO                                                                    | CH <sub>3</sub> O <sub>2</sub> | 5.23E-12 <sup>b</sup>                                                 |
| CH <sub>3</sub> O                                  | O <sub>2</sub>                                                                     | HO <sub>2</sub>                                    | Formaldehyde                                                          |                                | 2.00E-15 <sup>b</sup>                                                 |

|                                                                                    |                                                                                    |                                                                                    |                                                                       |                 |                        |
|------------------------------------------------------------------------------------|------------------------------------------------------------------------------------|------------------------------------------------------------------------------------|-----------------------------------------------------------------------|-----------------|------------------------|
| CH <sub>3</sub> O <sub>2</sub>                                                     | HO <sub>2</sub>                                                                    | CH <sub>3</sub> OOH                                                                |                                                                       |                 | 4.74E-12 <sup>b</sup>  |
| CH <sub>3</sub> O <sub>2</sub>                                                     | HO <sub>2</sub>                                                                    | Formaldehyde                                                                       |                                                                       |                 | 4.67E-13 <sup>b</sup>  |
| CH <sub>3</sub> O <sub>2</sub>                                                     | CH <sub>3</sub> O <sub>2</sub>                                                     | CH <sub>3</sub> O                                                                  | CH <sub>3</sub> O                                                     | O <sub>2</sub>  | 1.20E-13 <sup>f</sup>  |
| CH <sub>3</sub> O <sub>2</sub>                                                     | CH <sub>3</sub> O <sub>2</sub>                                                     | MeOH                                                                               | Formaldehyde                                                          | O <sub>2</sub>  | 2.40E-13 <sup>f</sup>  |
| CH <sub>3</sub> O <sub>2</sub>                                                     | HO(CH <sub>3</sub> ) <sub>2</sub> CC(CH <sub>3</sub> ) <sub>2</sub> O <sub>2</sub> | CH <sub>3</sub> O                                                                  | HO(CH <sub>3</sub> ) <sub>2</sub> CC(CH <sub>3</sub> ) <sub>2</sub> O |                 | 4.00E-16 <sup>fj</sup> |
| CH <sub>3</sub> O <sub>2</sub>                                                     | HO(CH <sub>3</sub> ) <sub>2</sub> CC(CH <sub>3</sub> ) <sub>2</sub> O <sub>2</sub> | Pinacol                                                                            | Formaldehyde                                                          |                 | 2.70E-15 <sup>fj</sup> |
| MeOH                                                                               | OH                                                                                 | HO <sub>2</sub>                                                                    | Formaldehyde                                                          |                 | 8.95E-13 <sup>b</sup>  |
| CH <sub>3</sub> OOH                                                                | OH                                                                                 | Formaldehyde                                                                       | OH                                                                    |                 | 6.02E-12 <sup>b</sup>  |
| CH <sub>3</sub> OOH                                                                | OH                                                                                 | CH <sub>3</sub> O                                                                  | OH                                                                    |                 | 4.01E-12 <sup>b</sup>  |
| O                                                                                  | O <sub>2</sub> +M                                                                  | O <sub>3</sub> +M                                                                  |                                                                       |                 | 1.40E-14 <sup>g</sup>  |
| O                                                                                  | O <sub>3</sub>                                                                     | O <sub>2</sub>                                                                     | O <sub>2</sub>                                                        |                 | 8.00E-15 <sup>g</sup>  |
| O                                                                                  | OH                                                                                 | O <sub>2</sub>                                                                     | H                                                                     |                 | 3.50E-11 <sup>g</sup>  |
| O                                                                                  | HO <sub>2</sub>                                                                    | OH                                                                                 | O <sub>2</sub>                                                        |                 | 5.80E-11 <sup>g</sup>  |
| O                                                                                  | H <sub>2</sub> O <sub>2</sub>                                                      | OH                                                                                 | HO <sub>2</sub>                                                       |                 | 1.70E-15 <sup>g</sup>  |
| OH                                                                                 | H <sub>2</sub>                                                                     | H <sub>2</sub> O                                                                   | H                                                                     |                 | 6.70E-15 <sup>g</sup>  |
| OH                                                                                 | OH                                                                                 | H <sub>2</sub> O                                                                   | O                                                                     |                 | 1.48E-12 <sup>g</sup>  |
| OH                                                                                 | OH                                                                                 | H <sub>2</sub> O <sub>2</sub>                                                      |                                                                       |                 | 6.20E-12 <sup>g</sup>  |
| OH                                                                                 | HO <sub>2</sub>                                                                    | H <sub>2</sub> O                                                                   | O <sub>2</sub>                                                        |                 | 1.10E-10 <sup>g</sup>  |
| OH                                                                                 | H <sub>2</sub> O <sub>2</sub>                                                      | H <sub>2</sub> O                                                                   | HO <sub>2</sub>                                                       |                 | 1.70E-12 <sup>g</sup>  |
| OH                                                                                 | O <sub>3</sub>                                                                     | HO <sub>2</sub>                                                                    | O <sub>2</sub>                                                        |                 | 7.30E-14 <sup>g</sup>  |
| TME                                                                                | O <sub>3</sub>                                                                     | Acetone                                                                            | Criegee                                                               |                 | 1.13E-15 <sup>b</sup>  |
| TME                                                                                | OH                                                                                 | OH-TME-O <sub>2</sub>                                                              |                                                                       |                 | 1.10E-10 <sup>b</sup>  |
| OH-TME-O <sub>2</sub>                                                              | O <sub>2</sub>                                                                     | HO(CH <sub>3</sub> ) <sub>2</sub> CC(CH <sub>3</sub> ) <sub>2</sub> O <sub>2</sub> |                                                                       |                 | 1.00E06 <sup>b</sup>   |
| HO(CH <sub>3</sub> ) <sub>2</sub> CC(CH <sub>3</sub> ) <sub>2</sub> O              |                                                                                    | Acetone                                                                            | Acetone                                                               | HO <sub>2</sub> | 1.00E06 <sup>b</sup>   |
| HO(CH <sub>3</sub> ) <sub>2</sub> CC(CH <sub>3</sub> ) <sub>2</sub> O <sub>2</sub> | HO <sub>2</sub>                                                                    | HO(CH <sub>3</sub> ) <sub>2</sub> CC(CH <sub>3</sub> ) <sub>2</sub> OOH            |                                                                       |                 | 1.76E-11 <sup>bj</sup> |
| HO(CH <sub>3</sub> ) <sub>2</sub> CC(CH <sub>3</sub> ) <sub>2</sub> O <sub>2</sub> | HO(CH <sub>3</sub> ) <sub>2</sub> CC(CH <sub>3</sub> ) <sub>2</sub> O <sub>2</sub> | HO(CH <sub>3</sub> ) <sub>2</sub> CC(CH <sub>3</sub> ) <sub>2</sub> O              | HO(CH <sub>3</sub> ) <sub>2</sub> CC(CH <sub>3</sub> ) <sub>2</sub> O |                 | 5.70E-15 <sup>bj</sup> |
| Pinacol                                                                            | OH                                                                                 | HO(CH <sub>3</sub> ) <sub>2</sub> CC(CH <sub>3</sub> ) <sub>2</sub> O              |                                                                       |                 | 9.49E-13 <sup>b</sup>  |
| HO(CH <sub>3</sub> ) <sub>2</sub> CC(CH <sub>3</sub> ) <sub>2</sub> OOH            | OH                                                                                 | HO(CH <sub>3</sub> ) <sub>2</sub> CC(CH <sub>3</sub> ) <sub>2</sub> O <sub>2</sub> |                                                                       |                 | 4.40E-12 <sup>b</sup>  |
| OH                                                                                 | Glutaric Acid                                                                      | Ox Products                                                                        |                                                                       |                 | 2.11 <sup>i</sup>      |

33 <sup>a</sup> This unit for rate constant applies only to bimolecular reactions. For a unimolecular reaction, the unit for rate constant is s<sup>-1</sup>.

34 <sup>b</sup> Master Chemical Mechanism<sup>1,2</sup>

35 <sup>c</sup> Atkinson et al. 2006<sup>3</sup>

36 <sup>d</sup> Zuraski et al. 2023<sup>4</sup>

37 <sup>e</sup> Assali et al. 2022<sup>5</sup>

38 <sup>f</sup> Villenave et al. 1998<sup>6</sup>

39 <sup>g</sup> Atkinson et al. 2004<sup>7</sup>

40 <sup>h</sup> Pinacol is 2,3-dimethylbutane-2,3-diol

41 <sup>i</sup> See Text S1

42 <sup>j</sup> Rate constants used here for the reaction of the hydroxy-TME radicals are based on the reactions of the *t*-butyl peroxy radical as suggested by  
43 Jenkin et al.<sup>8</sup>

44 **Text S1.** *Calculation of Collision Rates and Related Discussion.*

45

46 To examine the effect that the particle surfaces play on the modeled OH concentrations, the  
 47 collision rate between GA particles and the gas-phase OH radical as a function of surface area is  
 48 calculated. Only the particle surface is considered here as a sink for gaseous OH and the model  
 49 does not consider surface depletion. The rate of reaction of OH with the surface ( $\text{cm}^{-3} \text{s}^{-1}$ ) is  
 50 given by eq. S1,

$$51 \quad \text{Rate} = Z \times (SA) \times \gamma = k [OH] \quad (\text{S1})$$

52 where  $k$  ( $\text{s}^{-1}$ ) is the pseudo-first order rate constant for the reaction of OH with GA and  $Z$  is the  
 53 number of collisions per second per unit surface area, defined in Equation S2:

$$54 \quad Z = \frac{\text{Collisions}}{\text{cm}^2 * \text{s}} = [OH] \sqrt{\frac{RT}{2\pi M}} \times \frac{100 \text{ cm}}{m} \quad (\text{S2})$$

55 SA is the surface area concentration in  $\text{cm}^2$  per  $\text{cm}^3$  air as measured by SMPS;  $\gamma$  is the  
 56 probability of a collision leading to a loss of OH through reaction; and  $[OH]$  is the number  
 57 concentration of OH radicals in molecules  $\text{cm}^{-3}$ .  $R$  is the ideal gas law constant ( $\text{J/mol K}$ );  $T$  is  
 58 room temperature ( $\text{K}$ ); and  $M$  is the molecular weight of the gas species ( $\text{kg/mol}$ ).<sup>9</sup>

59

60 From Equations S1 and S2 the rate constant  $k$  is given by:

$$61 \quad k = \sqrt{\frac{RT}{2\pi M}} \times \frac{100 \text{ cm}}{m} \times (SA) \times \gamma \quad (\text{S3})$$

62 The value of  $\gamma$  is estimated from the gas-phase rate constant of OH with alkanes of similar  
 63 number of carbons ( $\sim 5 \times 10^{-12} \text{ cm}^3 \text{ molecule}^{-1}$ ) relative to a collision-controlled value of  $\sim 1 \times 10^{-10}$   
 64  $\text{cm}^3 \text{ molecule}^{-1} \text{ s}^{-1}$ . Using a value of 0.05 for  $\gamma$ , values for  $k$  can be estimated as summarized in  
 65 Table S2. Varying the KinSim model rate constant between the minimum and maximum surface  
 66 areas resulted in negligible change in modeled OH concentrations. This is expected since the  
 67 major loss process for OH is reaction with TME. As such, a mean value  $2.1 \text{ s}^{-1}$  is used in the  
 68 model.

69 **Table S2.** Estimated rate constants  $k$  and average OH concentrations for the reaction  $\text{OH} \rightarrow$   
 70 Products as surface area concentrations are varied at 0.9 ppm TME and 7.5 ppm  $\text{O}_3$ .

| GA Aqueous Concentration<br>(mM) | Particle Surface Area Concentration<br>( $\text{nm}^2/\text{cm}^3$ ) | $k$<br>( $\text{s}^{-1}$ ) | $[\text{OH}]_{\text{avg}}$<br>( $\text{cm}^{-3}$ ) |
|----------------------------------|----------------------------------------------------------------------|----------------------------|----------------------------------------------------|
| 10                               | $1.2 \times 10^{11}$                                                 | 0.86                       | $7.2 \times 10^8$                                  |
| 20                               | $2.5 \times 10^{11}$                                                 | 1.8                        | $7.2 \times 10^8$                                  |
| 40                               | $3.6 \times 10^{11}$                                                 | 2.6                        | $7.2 \times 10^8$                                  |
| 60                               | $4.2 \times 10^{11}$                                                 | 3.1                        | $7.2 \times 10^8$                                  |

71

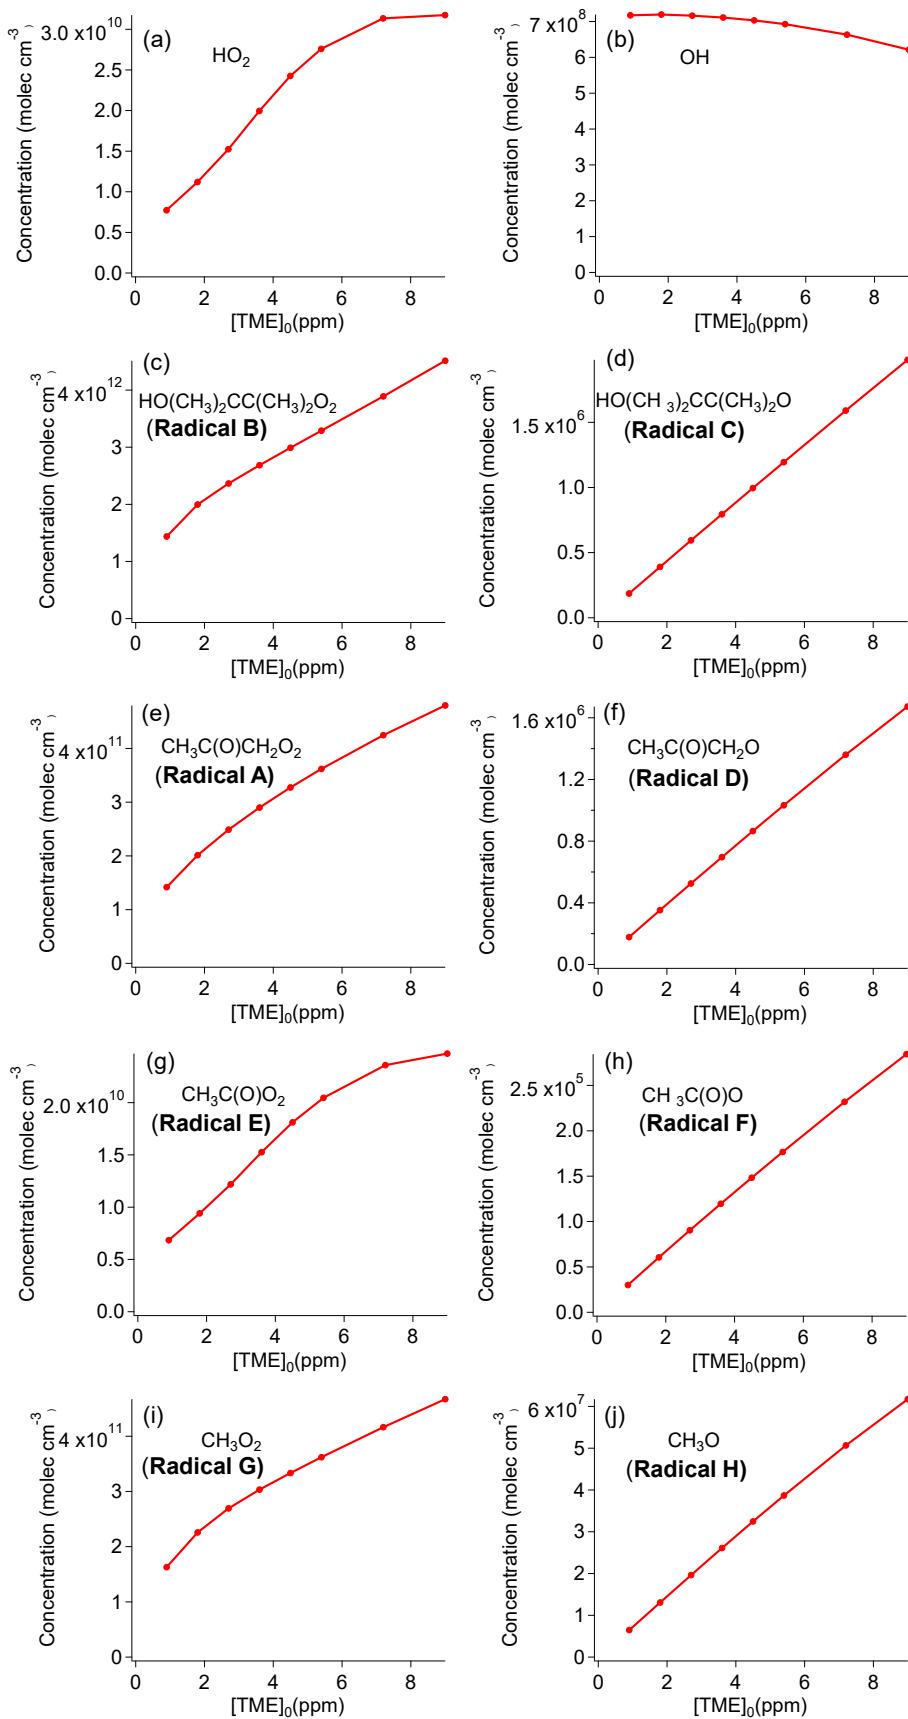

73 **Figure S3.** The 22-second predicted average concentration of gas-phase radicals as a function  
74 of  $[\text{TME}]_0$  are shown, for initial conditions of 7.5 ppm  $\text{O}_3$  and variable  $[\text{TME}]_0$  in air. (a)  $\text{HO}_2$ ; (b)  
75 OH; (c) Radical B = hydroxy-TME-peroxy =  $\text{HO}(\text{CH}_3)_2\text{CC}(\text{CH}_3)_2\text{O}_2$ ; (d) Radical C = hydroxy-  
76 TME-alkoxy =  $\text{HO}(\text{CH}_3)_2\text{CC}(\text{CH}_3)_2\text{O}$ ; (e) Radical A = acetyl peroxy =  $\text{CH}_3\text{C}(\text{O})\text{CH}_2\text{O}_2$ ; (f)  
77 Radical D = acetyl alkoxy =  $\text{CH}_3\text{C}(\text{O})\text{CH}_2\text{O}$ ; (g) Radical E = acetyl peroxy =  $\text{CH}_3\text{C}(\text{O})\text{O}_2$ ; (h)  
78 Radical F = acetyl alkoxy =  $\text{CH}_3\text{C}(\text{O})\text{O}$ ; (i) Radical G = methyl peroxy =  $\text{CH}_3\text{O}_2$ ; (j) Radical H =  
79 methyl alkoxy =  $\text{CH}_3\text{O}$ .

80

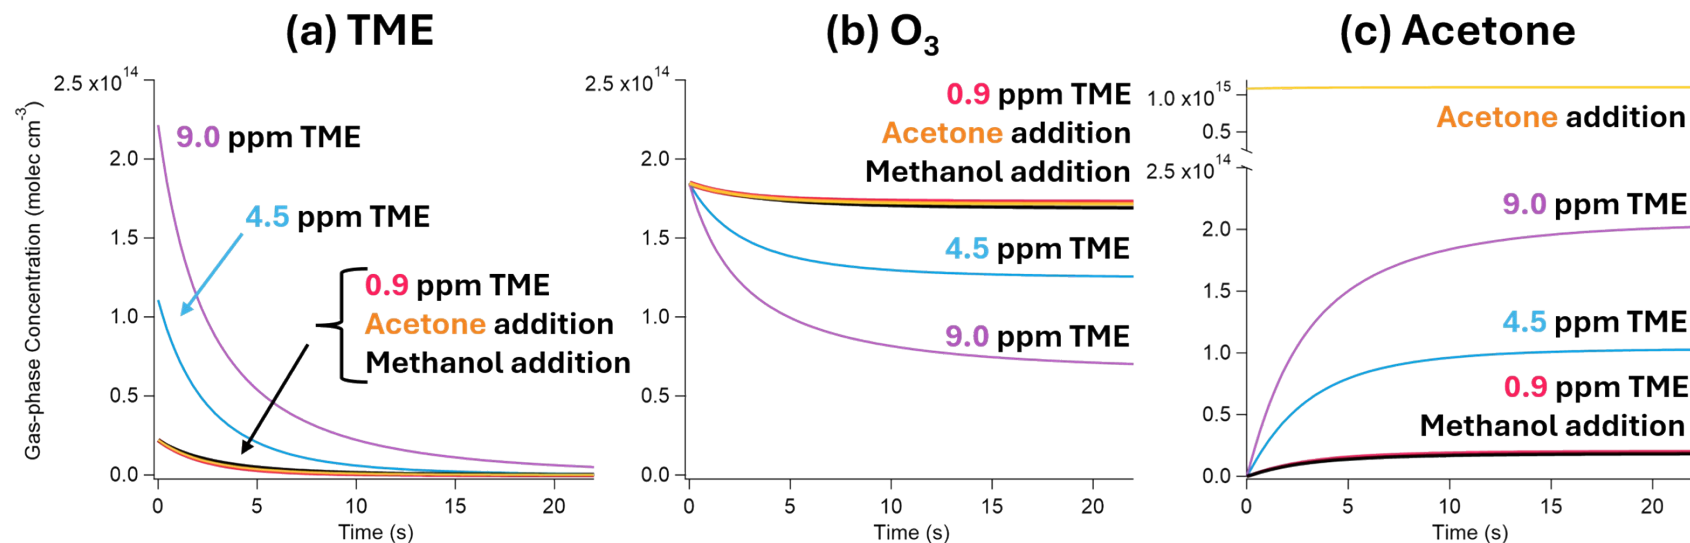

81

82 **Figure S4.** Time series of **(a)** TME, **(b)** ozone, and **(c)** acetone concentrations from the KinSim model for different initial conditions  
 83 of 7.5 ppm  $O_3$  and  $[TME]_0$  of 0.9 (red), 4.5 (blue), and 9.0 (purple) ppm, as well as with additions of 44 ppm acetone (orange) or 53  
 84 ppm methanol (black).  $[TME]_0$  is 0.9 ppm except where otherwise noted.

85 **Text S2.** *Offline UHPLC-HESI-HRMS Analysis of GA*

86 Unreacted glutaric acid was examined for impurities using offline ultra-high-pressure liquid  
87 chromatography with heated electrospray ionization and high-resolution mass spectrometry  
88 (UHPLC-HESI-HRMS, Thermo Fisher Scientific, Vanquish UHPLC, Q Exactive Plus orbitrap).  
89 The instrument and technique have been described in detail previously.<sup>10</sup> Briefly, 10  $\mu\text{L}$  of an  
90 aqueous GA solution (240  $\mu\text{g}/\text{mL}$ ) were injected onto a Polar C18 column (Phenomenex, Luna  
91 Omega 1.6  $\mu\text{m}$  Polar C18, 150 x 2.1 mm) at 30°C with a mobile phase of solvent A, 0.1% formic  
92 acid (Sigma Aldrich, 98+%) in water (Nanopure, 18.2 M $\Omega$  cm) and B, 0.1% formic acid in  
93 acetonitrile (Fisher, Optima LC-MS grade). A gradient elution was used beginning at 95% solvent  
94 A which linearly decreased to 5% A at a rate of 6.4%/min. GA was used from the manufacturer  
95 without further purification.

96 Additional LC-MS analysis was carried out on unreacted or oxidized GA particles that had been  
97 atomized, dried, and passed through the flow tube and were collected on PTFE filters (Fluoropore  
98 0.2  $\mu\text{m}$ ) with the aid of a pump (SKC, Leland Legacy) placed downstream of the filter. Collected  
99 particles were extracted using water or deuterium oxide. The mass spectra of unreacted GA showed  
100 no difference before and after atomization, indicating no changes in the surface composition of  
101 GA due to the atomization process.

102

103

104 **Text S3.** *Discussion of Experiments to Determine the Identity of  $m/z$  189.*

105 In the previous study,<sup>10</sup> the peak at  $m/z$  189 was tentatively assigned to a tricarboxylic acid  
106 formed from the reaction of a GA alkyl R radical with a second alkyl radical, a radical  
107 decomposition product of a GA RO radical, based on high-resolution mass measurements which  
108 revealed an elemental formula of  $C_7H_{10}O_6$ . However, results from this study indicate that the  
109 formation of the product at  $m/z$  189 appears to vary as gas-phase radical concentrations are  
110 changed, and as such the identity and formation mechanism of this product are revisited here.

111 To confirm that the species at  $m/z$  189 (MW 190) arises from GA oxidation rather than  
112 exclusively from reaction of gas-phase species that condense on the GA, an experiment was  
113 conducted using 3-methylglutaric acid (3-MGA) in place of GA as the matrix particle. Upon OH  
114 oxidation, analogous oxidation products of 3-MGA were observed, including the ROH ( $m/z$  161),  
115 R=O ( $m/z$  159), and ROOH ( $m/z$  177) species (Figure S5). Of note, a peak at  $m/z$  189 was absent,  
116 and instead a peak at  $m/z$  203 appeared, consistent with the addition of the  $-CH_3$  group substituent  
117 in 3-MGA. This peak at  $m/z$  203 increases with increased  $[TME]_0$ , just as  $m/z$  189 does in the  
118 spectrum of oxidized GA. If a product had formed solely in the gas phase and condensed on the  
119 surface of the matrix particle, it would be observed in the MAIV mass spectra at the same  $m/z$   
120 regardless of matrix particle. As such, the mass shift suggests that the product seen at  $m/z$  189 in  
121 the oxidation of GA must incorporate a GA molecule.

122 To further rule out whether  $m/z$  189 was formed exclusively through gas-phase chemistry  
123 (*i.e.*, through accretion reactions of TME oxidation products), an experiment was performed in  
124 which TME and ozone were allowed to react inside the flow tube in the absence of GA particles,  
125 forming gas-phase products. GA matrix particles were then added at the end of the flow tube  
126 before entering the mass spectrometer. Resulting MAIV mass spectra revealed no products

127 which had condensed onto particles, including at  $m/z$  189. From this it is concluded that the peak  
128 observed at  $m/z$  189 in the OH oxidation of GA is likely not produced in the gas phase.

129 It is also noted that the mass of 190 corresponds to the mass of GA (132) plus that of acetone  
130 (58). Because acetone is produced in high quantities during the ozonolysis of TME (Figure S4),  
131 experiments were performed to rule out whether  $m/z$  189 is an adduct or complex between GA and  
132 acetone. First, an experiment was performed in which GA particles were exposed to high  
133 concentrations of acetone in the flow tube, in the absence of OH radicals. In addition, in order to  
134 observe whether exposure to OH radicals had disrupted the surface of particles sufficiently to  
135 encourage acetone adducts to form on the oxidized particle surface, oxidation of GA was  
136 performed in the flow tube followed by a denuder placed at the end of the flow tube. Acetone was  
137 then added after the denuder before particles entered the mass spectrometer. Because the denuder  
138 removed gas-phase oxidants including OH radicals and ozone, any increase of intensity at  $m/z$  189  
139 would necessarily be produced by adducts between acetone and the oxidized particle, rather than  
140 by gas-phase species products by the oxidation of acetone. The addition of acetone after the  
141 denuder produced no appreciable increase in  $m/z$  189. As such, the acetone adduct was ruled out.

142 MS/MS spectra were collected to observe fragmentation of the product at  $m/z$  189 (Figure S6).  
143 Collection was performed in negative ion mode with collision energy (CE) ranging between 2 and  
144 20 eV. Major daughter ions were observed at  $m/z$  131 and 75, with later daughters at higher CE at  
145  $m/z$  113, 87, and 69.  $m/z$  131 is believed to be an isomer of deprotonated GA, as daughters at  $m/z$   
146 113, 87, and 69 are previously reported daughters of GA with losses of  $H_2O$ ,  $CO_2$ , or  $H_2O + CO_2$   
147 respectively.<sup>11</sup> At this time, the identity of the daughter ion at  $m/z$  75 is not known. However, the  
148 molecular identity of  $m/z$  75 was additionally verified using MS/MS fragmentation in high-

149 resolution Orbitrap LC-MS, which revealed a formula of  $[C_2H_3O_3]^-$ . Possible identities for this ion  
150 include glycolate ( $HOCH_2C(O)O^-$ ) or peracetate ( $CH_3C(O)OO^-$ ).

151 Finally, in order to confirm the molecular formula and exact mass of the product, oxidized GA  
152 particles were collected on filters under conditions of both low and high TME. UHPLC-HESI-  
153 HRMS was performed on the resulting collected particles, the method of which is discussed above  
154 in Text S2. The high-resolution analysis of oxidation products revealed a product at  $m/z$  189.0304  
155 (53 ppm error from the exact mass of  $[C_7H_9O_6]^-$ ), which increased by 22-fold when comparing  
156 high vs low TME conditions.

157 In order to provide additional information on the structure of this product MAIV-MS  
158 experiments were performed atomizing a GA solution dissolved in  $D_2O$  rather than  $H_2O$ . By doing  
159 so, labile hydrogens in product structures such as those involved with O-H bonds are able to  
160 exchange with deuterium, thus shifting the observed  $m/z$  value in MAIV spectra by the number of  
161 potential exchange sites. Only partial deuteration was observed from products in the MAIV  
162 spectra, as MAIV-MS is a technique performed in ambient air and likely cannot avoid reversible  
163 exchange with protonated water vapor in indoor air. However, in the deuterated spectra, a peak at  
164  $m/z$  190 is present which is not present in protonated spectra (Figure S7). From this, it can be  
165 concluded that the product at  $m/z$  189 has no more than two labile hydrogens, matching the  
166 proposed structure of  $R''(O)OR$  (Scheme S1).

167 From these experiments a structure and formation mechanism are proposed here which produce  
168 the ester  $R''(O)OR$  from the reaction of Radical A and the GA  $RO_{2(surf)}$  (Scheme S1). It has been  
169 suggested that ether and ester accretion products can form between complexed RO radicals, one  
170 of which undergoes decomposition and results in the formation of a C-O bond.<sup>12,13</sup> The acetyl

171 radicals A and D increase as initial TME concentration increases (Figure S2), and thus may result  
172 in increased formation of the product at  $m/z$  189 as observed.

173

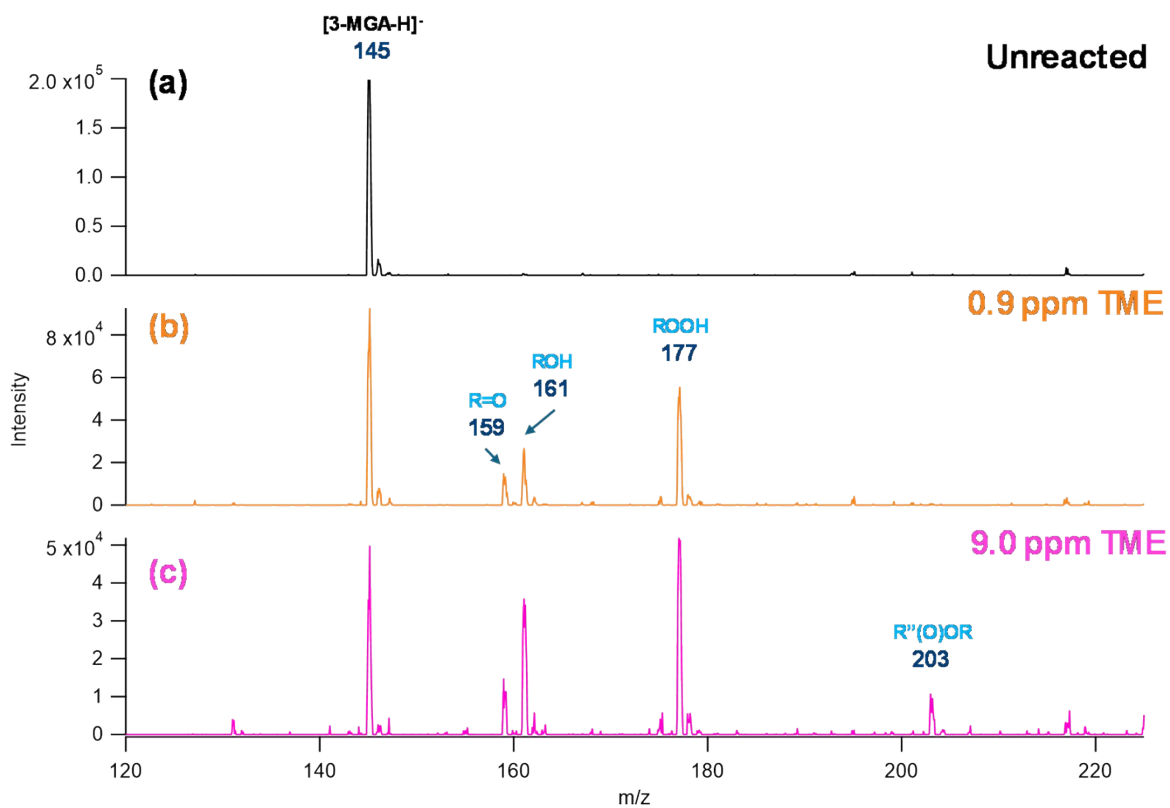

174

175

176 **Figure S5.** MAIV spectra of 3-MGA particles in negative ion mode. (a) unreacted 3-MGA  
177 particles (black); (b-c) 3-MGA particles reacted with OH radicals at initial conditions of 7.5 ppm  
178 ozone and (b) 0.9 ppm TME; (c) 9.0 ppm TME.

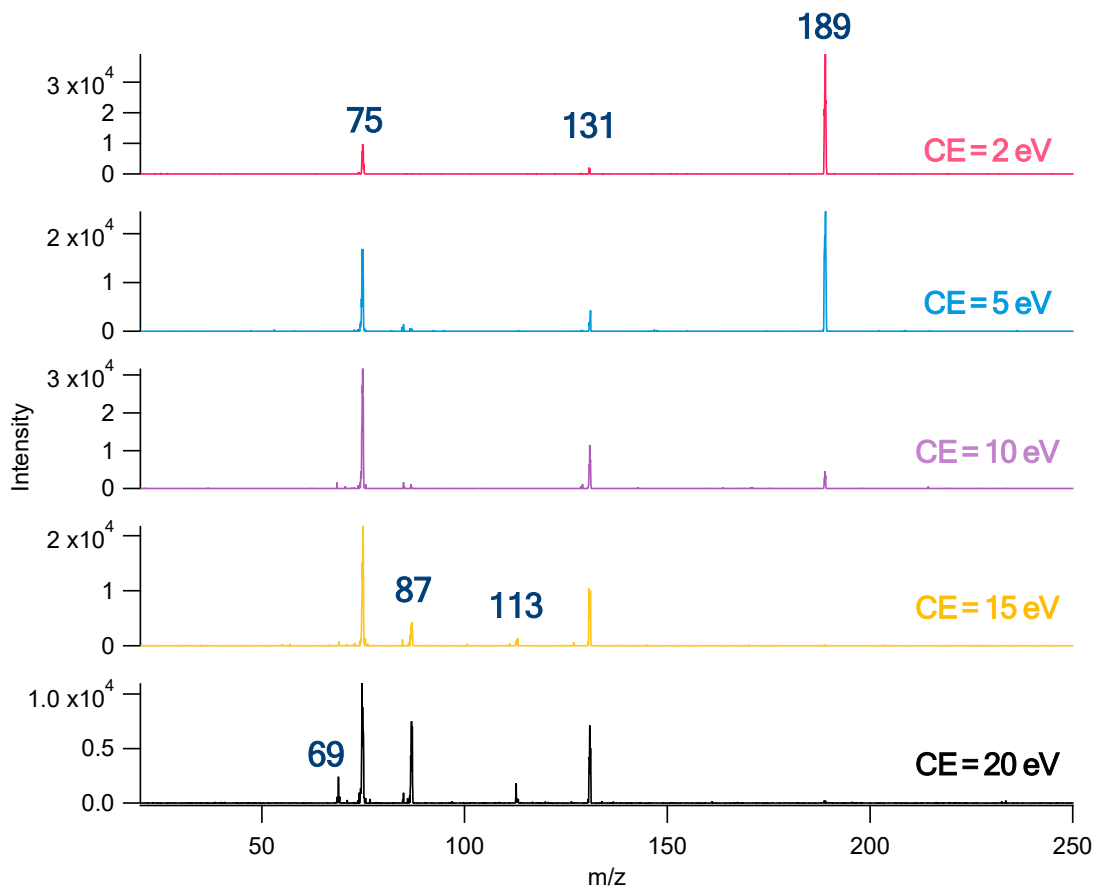

179

180 **Figure S6.** MS/MS spectra of  $m/z$  189 in negative ion mode. Oxidation was performed in flow  
181 tube apparatus using GA particles reacted with 10.8 ppm TME and 7.5 ppm ozone.

182

183

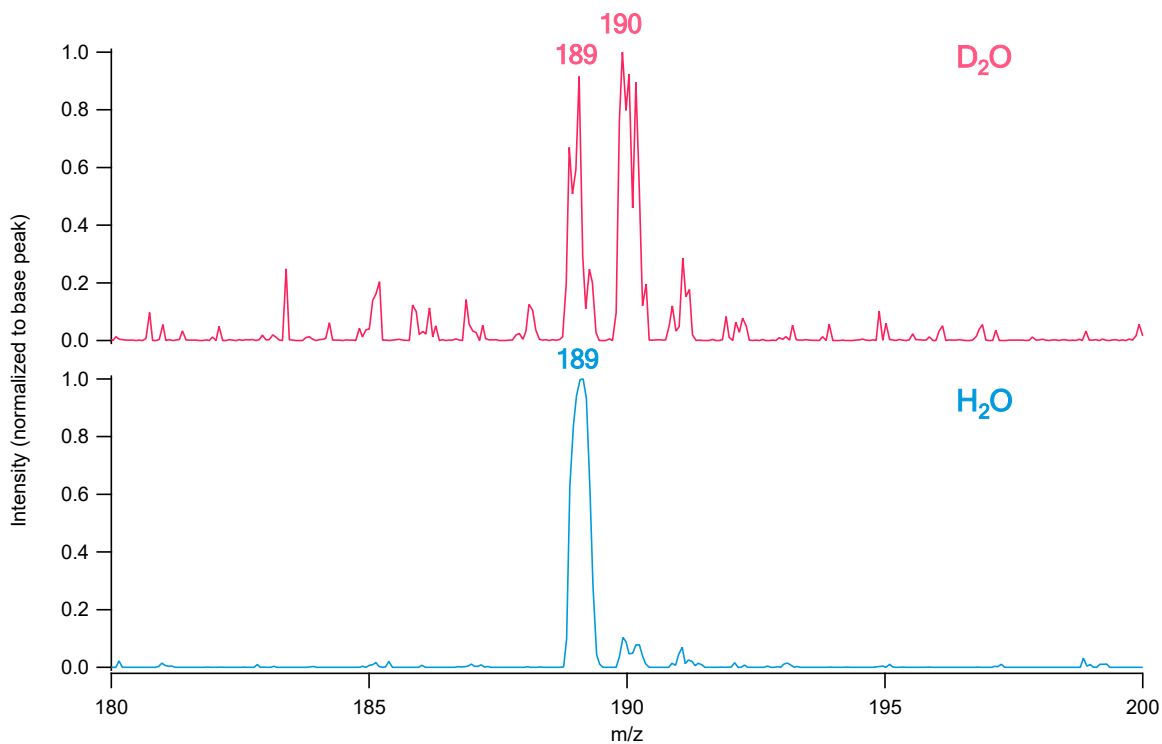

184

185 **Figure S7.** MAIV spectra of GA particles in negative ion mode after reaction with OH radicals  
186 at 9.0 ppm TME + 7.5 ppm ozone. Spectra of GA particles (**top**) dissolved in D<sub>2</sub>O; and (**bottom**)  
187 dissolved in H<sub>2</sub>O. [R''(O)OR - H]<sup>-</sup>, *m/z* 189; [R''(O)OR<sub>D</sub> - D]<sup>-</sup>, *m/z* 190. Peak intensities are  
188 normalized to the base peaks.

189

190

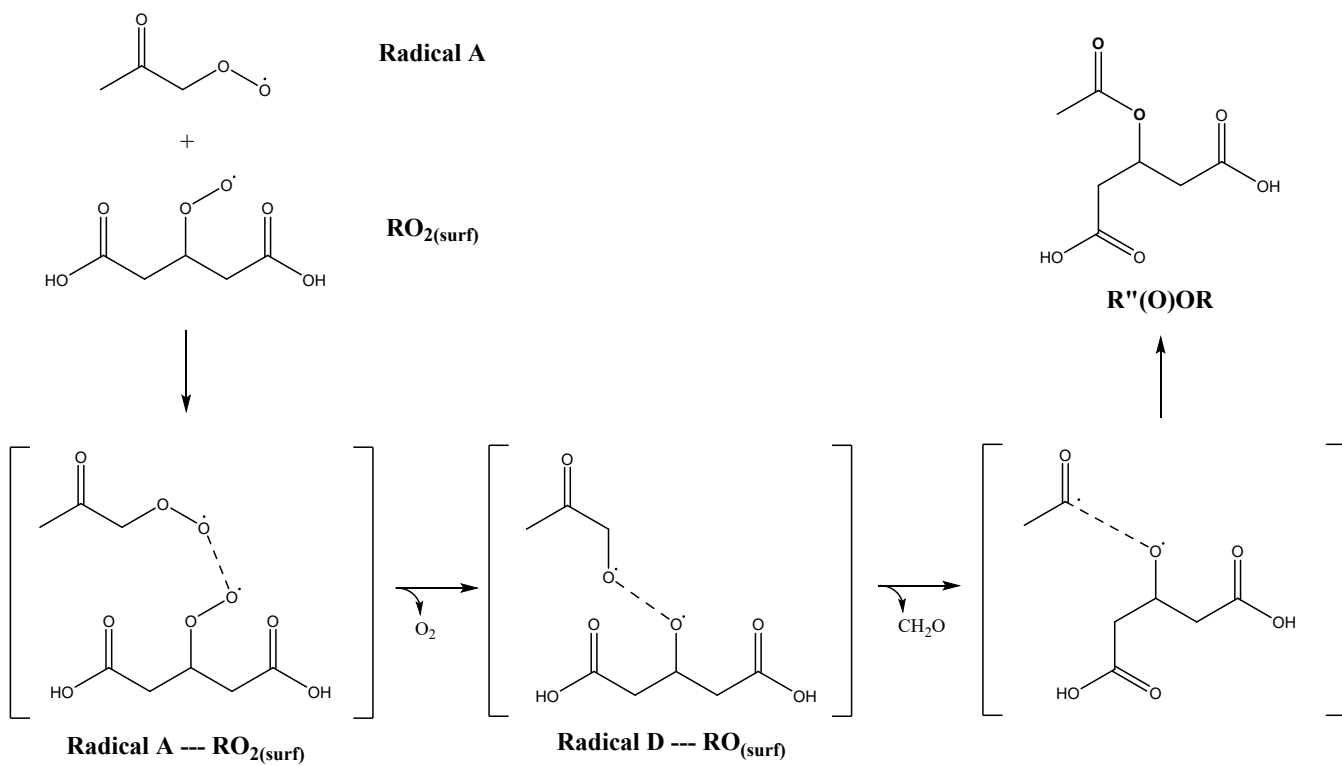

192 **Scheme S1.** Suggested formation mechanisms for an ester ( $\text{R}''(\text{O})\text{OR}$ ) of molecular weight  
 193 190.

195 **Text S4.** *Observation of Hydrogen-Deuterium Exchange using HESI-HRMS.*

196

197 Oxidized GA particles (0.9 ppm TME and 7.5 ppm O<sub>3</sub>) after filter collection were extracted  
198 using D<sub>2</sub>O (deuterium oxide, for NMR, Thermo Scientific, 99.8% atom D) instead of H<sub>2</sub>O and  
199 examined using offline Orbitrap HESI-HRMS. Samples were directly injected into the HESI inlet  
200 to avoid protonation from the protic eluent used in UHPLC. Species which possess labile hydrogen  
201 sites (*i.e.*, O-H bonds) will undergo hydrogen-deuterium exchange when dissolved in D<sub>2</sub>O. As  
202 such, the products in the resulting mass spectra will undergo a shift of  $m/z$  depending on the number  
203 of labile sites. Because ions in negative mode are observed as [M-D]<sup>-</sup>, deuterated peaks will shift  
204 +1  $m/z$  for each labile hydrogen not including one carboxylic acid site.

205 The HESI-HRMS mass spectrum reveals the presence of three major products from GA  
206 oxidation, including two expected oxidation products as well as one additional product (Figure  
207 S8). The peaks for the R=O and ROD products appear where expected: R=O is seen at  $m/z$  146,  
208 shifted +1 from its single acid group, and ROD is seen at  $m/z$  149, shifted +2 from its acid group  
209 and hydroxyl group. The ROOD species ( $m/z$  165) is not observed as a significant product in  
210 Orbitrap MS, which is expected due to the fragility of peroxide bonds in the harsh conditions of  
211 the electrospray ionization.<sup>10</sup> However, a product at  $m/z$  166 is observed, consistent with a diol  
212 R(OD)<sub>2</sub> which shifts +3 from its acid group and two hydroxyl groups.

213

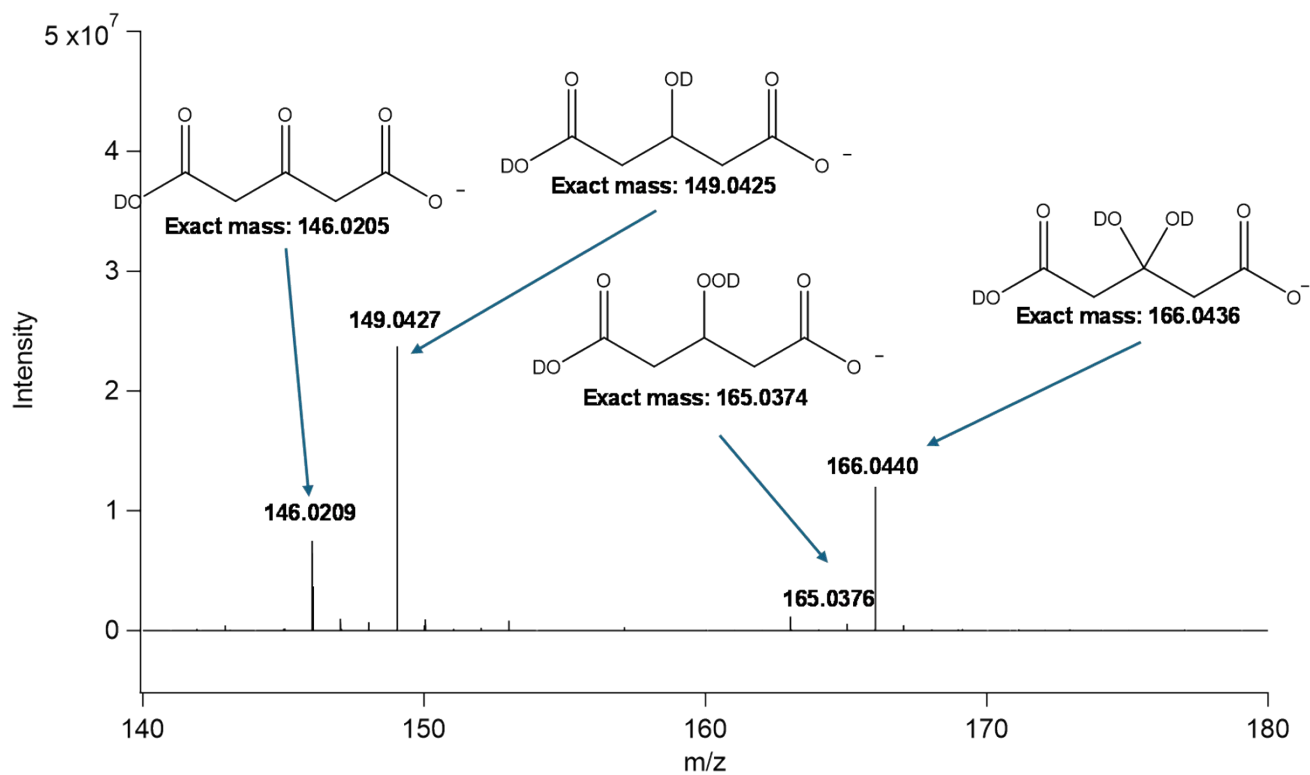

214

215 **Figure S8.** High-resolution mass spectrum obtained from HESI-Orbitrap direct injection of  
216 oxidized GA particles extracted in  $D_2O$  (9.0 ppm TME and 7.5 ppm  $O_3$ ). All accurate mass  
217 measurements were within 2.6 ppm error of exact masses for the structures provided.

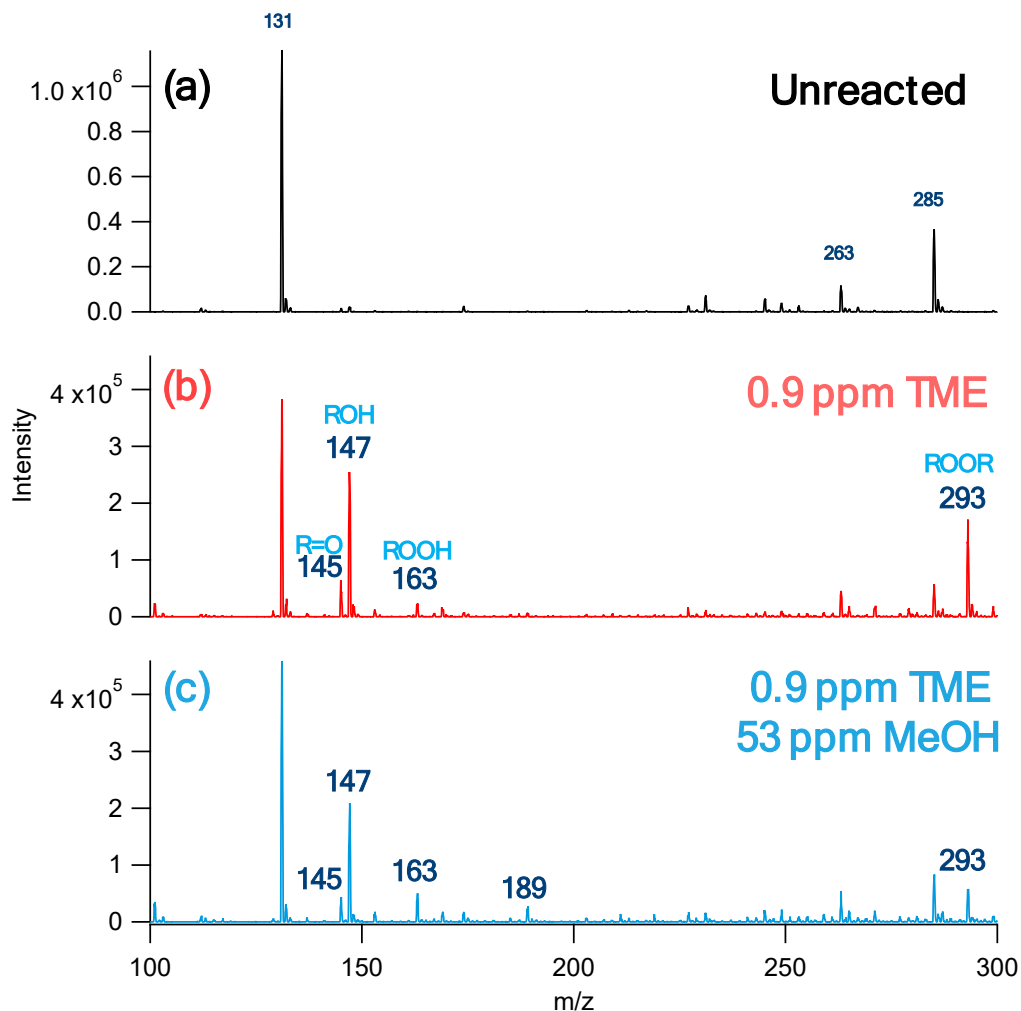

218

219 **Figure S9.** MAIV spectra of GA particles in negative ion mode. Spectra of GA particles (a)  
 220 unreacted; (b) reacted with OH radicals, 0.9 ppm TME + 7.5 ppm ozone; (c) reacted with OH  
 221 radicals in the presence of 53 ppm methanol. Numbered labels refer to peaks which correspond  
 222 either to GA or to its oxidation products, as discussed in the text. Additional peak assignments in  
 223 negative ion mode:  $[GA - H]^-$ ,  $m/z$  131;  $[2GA - H]^-$ ,  $m/z$  263;  $[2GA + Na - 2H]^-$ ,  $m/z$  285;  
 224  $[R''(O)OR - H]^-$ ,  $m/z$  189.

225

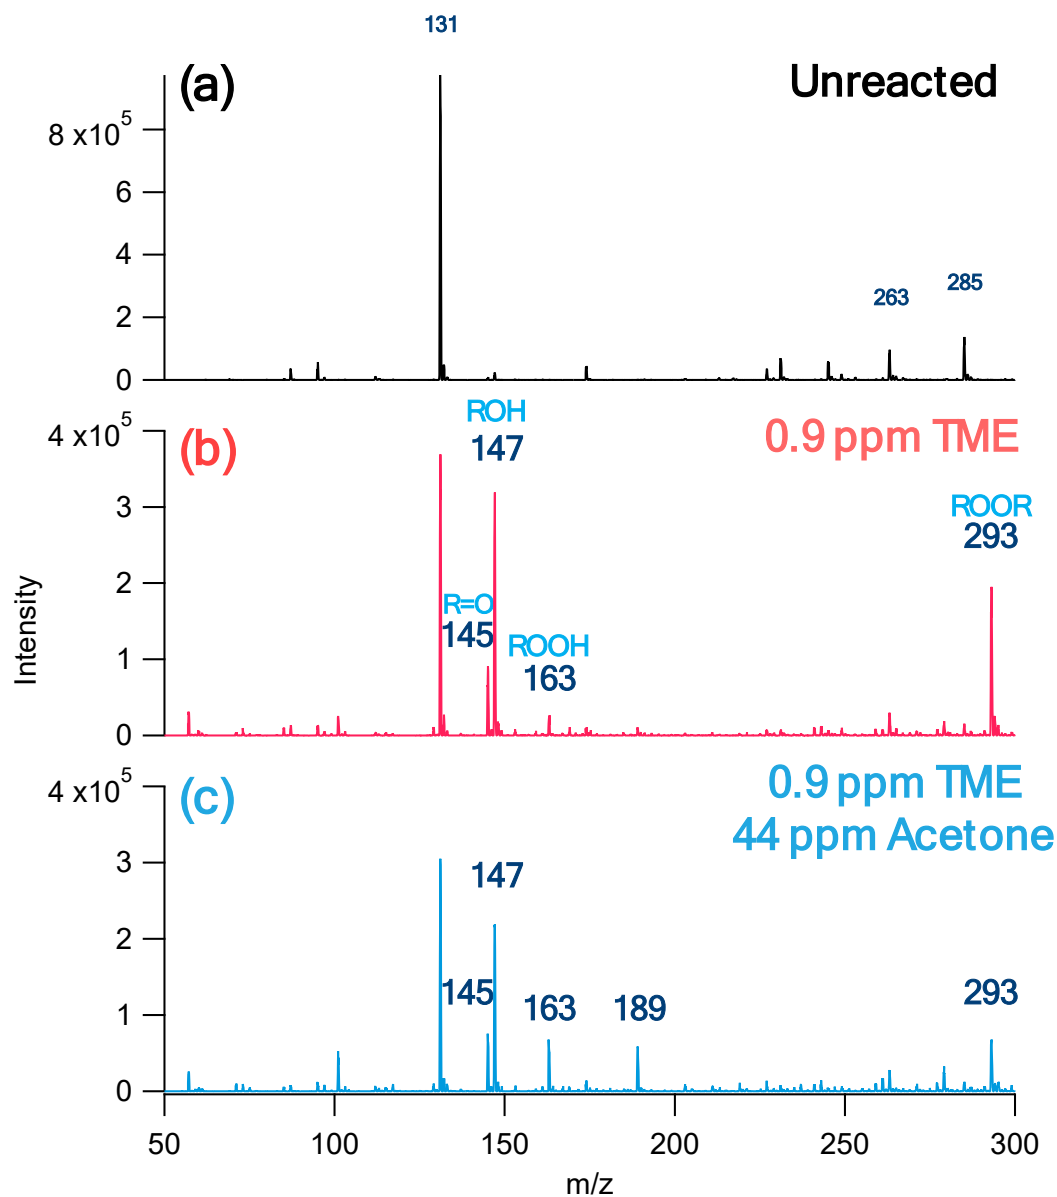

226

227 **Figure S10.** MAIV spectra of GA particles in negative ion mode before and after acetone  
 228 addition. Spectra of GA particles (a) unreacted; (b) reacted with OH radicals, 0.9 ppm TME + 7.5  
 229 ppm ozone; (c) reacted with OH radicals in the presence of 44 ppm acetone.  $[GA - H]^-$ ,  $m/z$  131;  
 230  $[2GA - H]^-$ ,  $m/z$  263;  $[2GA + Na - 2H]^-$ ,  $m/z$  285;  $[R''(O)OR - H]^-$ ,  $m/z$  189.

231

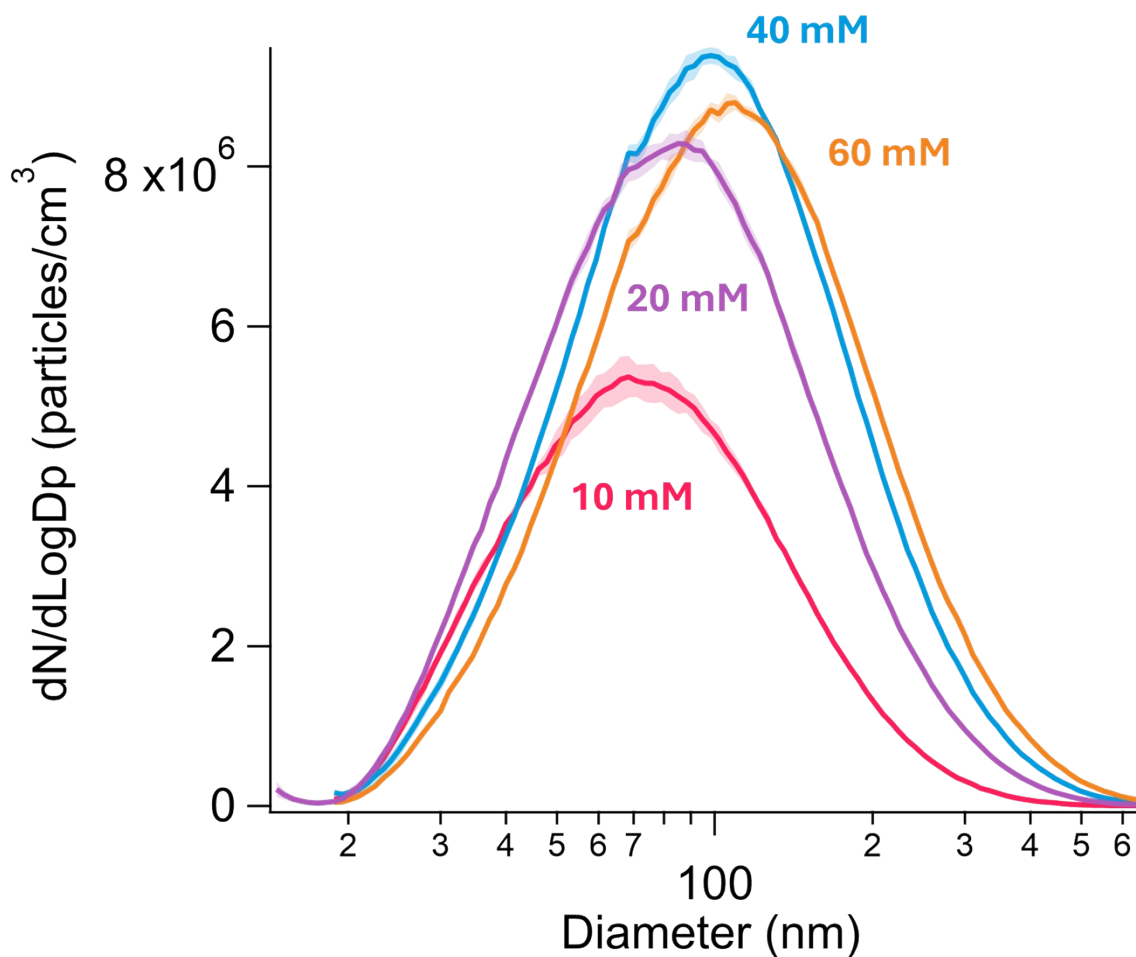

232

233

234 **Figure S11.** Typical size distributions of atomized and dried GA particles as concentration was  
235 varied as measured with a scanning mobility particle sizer (SMPS). Each distribution is an average  
236 of five scans  $\pm$  one standard deviation.

237

238

239 **Table S3.** Typical size properties of GA particles measured by the SMPS as the atomized  
 240 aqueous concentration was varied. Reported values are averages of 5 SMPS scans at each  
 241 concentration  $\pm$  one standard deviation.

| Atomized GA<br>Concentration<br>(mM) | Mode<br>Diameter<br>(nm) | Number<br>Concentration ( $\#/cm^3$ ) | Total Surface Area<br>( $nm^2/cm^3$ ) | Surface Area per<br>Particle (SA/N)<br>( $nm^2/part$ ) |
|--------------------------------------|--------------------------|---------------------------------------|---------------------------------------|--------------------------------------------------------|
| 10                                   | $70 \pm 4$               | $(3.47 \pm 0.06) \times 10^6$         | $(1.16 \pm 0.02) \times 10^{11}$      | $(3.35 \pm 0.08) \times 10^4$                          |
| 20                                   | $86 \pm 4$               | $(5.52 \pm 0.07) \times 10^6$         | $(2.48 \pm 0.01) \times 10^{11}$      | $(4.49 \pm 0.06) \times 10^4$                          |
| 40                                   | $99 \pm 3$               | $(6.15 \pm 0.07) \times 10^6$         | $(3.58 \pm 0.05) \times 10^{11}$      | $(5.82 \pm 0.09) \times 10^4$                          |
| 60                                   | $108 \pm 2$              | $(5.92 \pm 0.05) \times 10^6$         | $(4.18 \pm 0.04) \times 10^{11}$      | $(7.1 \pm 0.1) \times 10^4$                            |

242

243

244

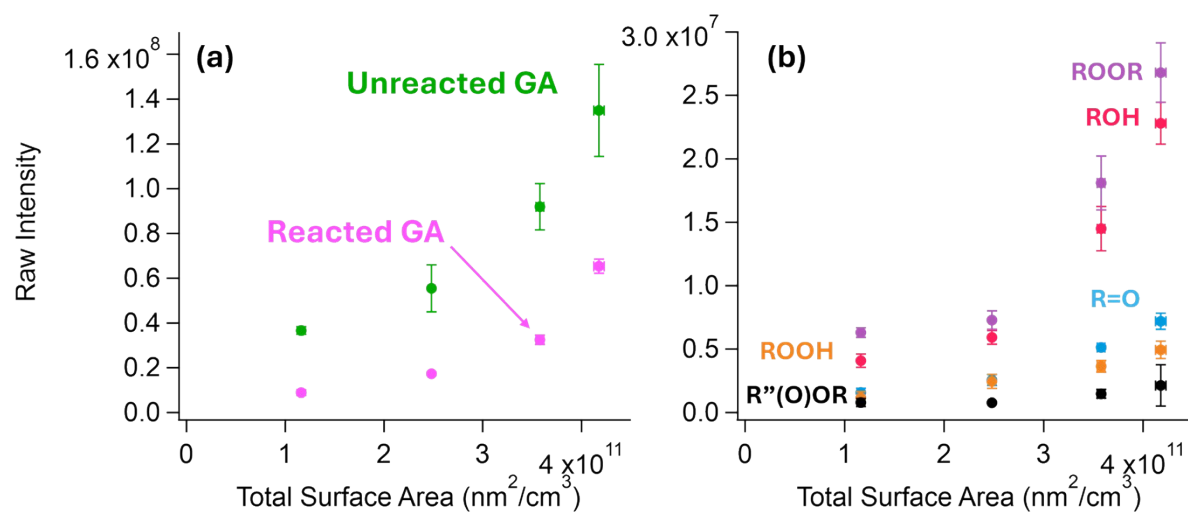

245

246 **Figure S12.** MAIV-MS intensity of (a) GA before and after oxidation and (b) each oxidation  
 247 product, normalized to the total particle concentration, as function of total GA surface area  
 248 across size dependence studies. Each species shows a positive trend with surface area. Vertical  
 249 error bars in intensity are  $\pm$  one standard deviation from  $n = 3$  while horizontal bars from surface  
 250 area measurements are from  $n = 5$ .

251

252

253

## 254 REFERENCES

- 255 1. Jenkin ME, Saunders SM, Pilling MJ. The tropospheric degradation of volatile organic  
256 compounds: A protocol for mechanism development. *Atmos Environ.* 1997;31(1):81-104.
- 257 2. Saunders SM, Jenkin ME, Derwent RG, Pilling MJ. Protocol for the development of the  
258 master chemical mechanism, MCM v3 (part a): Tropospheric degradation of non-aromatic  
259 volatile organic compounds. *Atmos Chem Phys.* 2003;3(1):161-80.
- 260 3. Atkinson R, Baulch DL, Cox RA, Crowley JN, Hampson RF, Hynes RG, et al. Evaluated  
261 kinetic and photochemical data for atmospheric chemistry: Volume ii - gas phase reactions of  
262 organic species. *Atmos Chem Phys.* 2006;6:3625-4055.
- 263 4. Zuraski K, Grieman FJ, Hui AO, Cowen J, Winiberg FAF, Percival CJ, et al. Acetonyl  
264 peroxy and hydroperoxy self- and cross-reactions: Temperature-dependent kinetic parameters,  
265 branching fractions, and chaperone effects. *J Phys Chem A.* 2023;127(37):7772-92.
- 266 5. Assali M, Fittschen C. Rate constants and branching ratios for the self-reaction of acetyl  
267 peroxy ( $\text{CH}_3\text{C}(\text{O})\text{O}_2$ ) and its reaction with  $\text{CH}_3\text{O}_2$ . *Atmosphere.* 2022;13(2).
- 268 6. Villenave E, Lesclaux R, Seefeld S, Stockwell WR. Kinetics and atmospheric  
269 implications of peroxy radical cross reactions involving the  $\text{CH}_3\text{C}(\text{O})\text{O}_2$  radical. *J Geophys Res-*  
270 *Atmos.* 1998;103(D19):25273-85.
- 271 7. Atkinson R, Baulch DL, Cox RA, Crowley JN, Hampson RF, Hynes RG, et al. Evaluated  
272 kinetic and photochemical data for atmospheric chemistry: Volume i - gas phase reactions of O,  
273  $\text{HO}_x$ ,  $\text{NO}_x$  and  $\text{SO}_x$  species. *Atmos Chem Phys.* 2004;4:1461-738.
- 274 8. Jenkin ME, Valorso R, Aumont B, Rickard AR. Estimation of rate coefficients and  
275 branching ratios for reactions of organic peroxy radicals for use in automated mechanism  
276 construction. *Atmos Chem Phys.* 2019;19(11):7691-717.
- 277 9. Finlayson-Pitts BJ, Pitts JN, Jr. *Chemistry of the upper and lower atmosphere - theory,*  
278 *experiments, and applications.* San Diego: Academic Press; 2000. 969 p.
- 279 10. Qin YM, Perraud V, Finlayson-Pitts BJ, Wingen LM. Peroxides on the surface of organic  
280 aerosol particles using matrix-assisted ionization in vacuum (MAIV) mass spectrometry. *Environ*  
281 *Sci Technol.* 2023;57(38):14260-8.
- 282 11. Grossert JS, Fancy PD, White RL. Fragmentation pathways of negative ions produced by  
283 electrospray ionization of acyclic dicarboxylic acids and derivatives. *Can J Chem.*  
284 2005;83(11):1878-90.
- 285 12. Peräkylä O, Berndt T, Franzon L, Hasan G, Meder M, Valiev RR, et al. Large gas-phase  
286 source of esters and other accretion products in the atmosphere. *J Am Chem Soc.*  
287 2023;145(14):7780-90.
- 288 13. Franzon L, Camredon M, Valorso R, Aumont B, Kurtén T. Ether and ester formation  
289 from peroxy radical recombination: A qualitative reaction channel analysis. *Atmos Chem Phys.*  
290 2024;24(20):11679-99.
